# Supplementary material for: Facile synthesis of RGD-conjugated unimolecular micelles based on a polyester dendrimer for targeting drug delivery
Source: Royal Society of Chemistry journal article supplement (doi:10.1039/c6tb02234k), 2016-12-30
Supplement: c6tb02234k1.pdf [file c6tb02234k1.pdf]

## Supporting information

### **Facile Synthesis of RGD-conjugated Unimolecular Micelles Based on Polyester Dendrimer for Targeting Drug Delivery**

Xiaoshan Fan<sup>a</sup>, Weiwei Zhang<sup>a</sup>, Zhiguo Hu<sup>a\*</sup>, Zibiao Li<sup>b\*</sup>

<sup>a</sup>Collaborative Innovation Center of Henan Province for Green Manufacturing of Fine Chemicals, Key Laboratory of Green Chemical Media and Reactions, Ministry of Education, School of Chemistry and Chemical Engineering, Henan Normal University, Xinxiang, 453007, People's Republic of China.

<sup>b</sup>Institute of Materials Research and Engineering, A\*STAR (Agency for Science, Technology and Research), 2 Fusionopolis Way, Innovis, #08-03, 138634 Singapore

Correspondence: Zhiguo Hu (zghu@htu.edu.cn); Z. Li (lizb@imre.a-star.edu.sg)

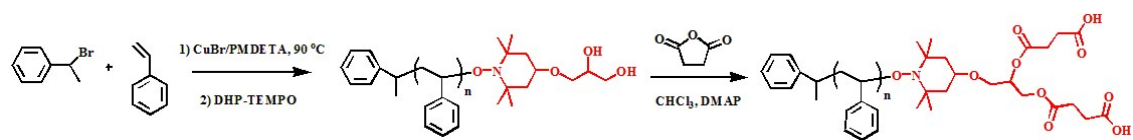

**Scheme S1.** Synthetic route to the support PS-2COOH according the literature<sup>1</sup>.

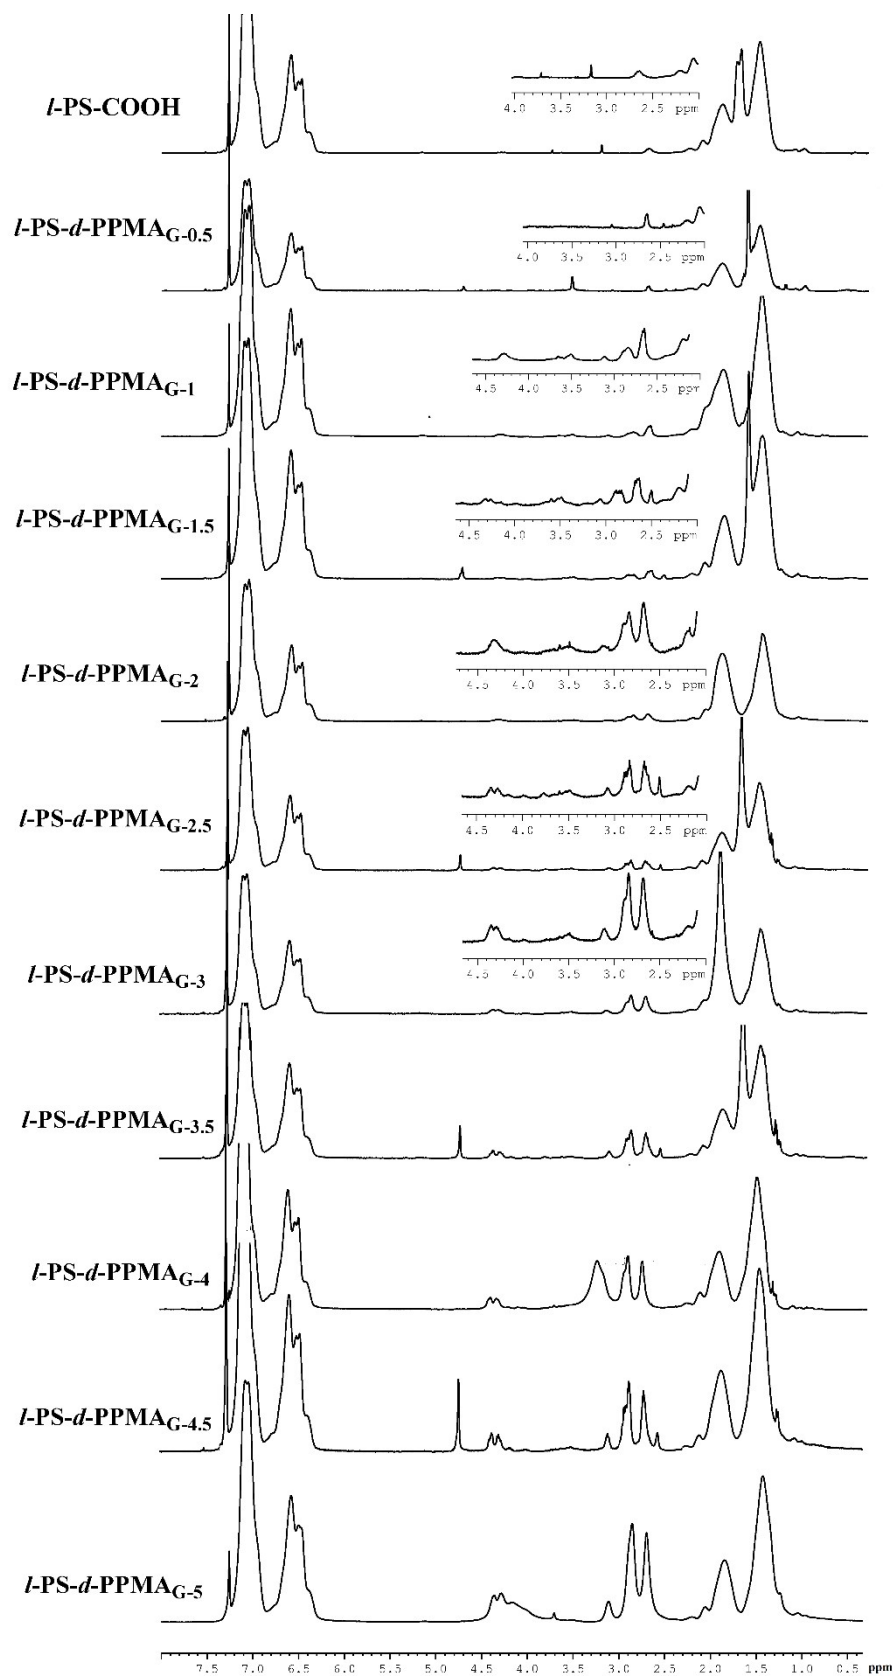

**Figure S1.**  $^1\text{H}$  NMR spectra of the hybrid copolymers *l*-PS-*d*-PPMA from G1 to G5 and their corresponding intermediates

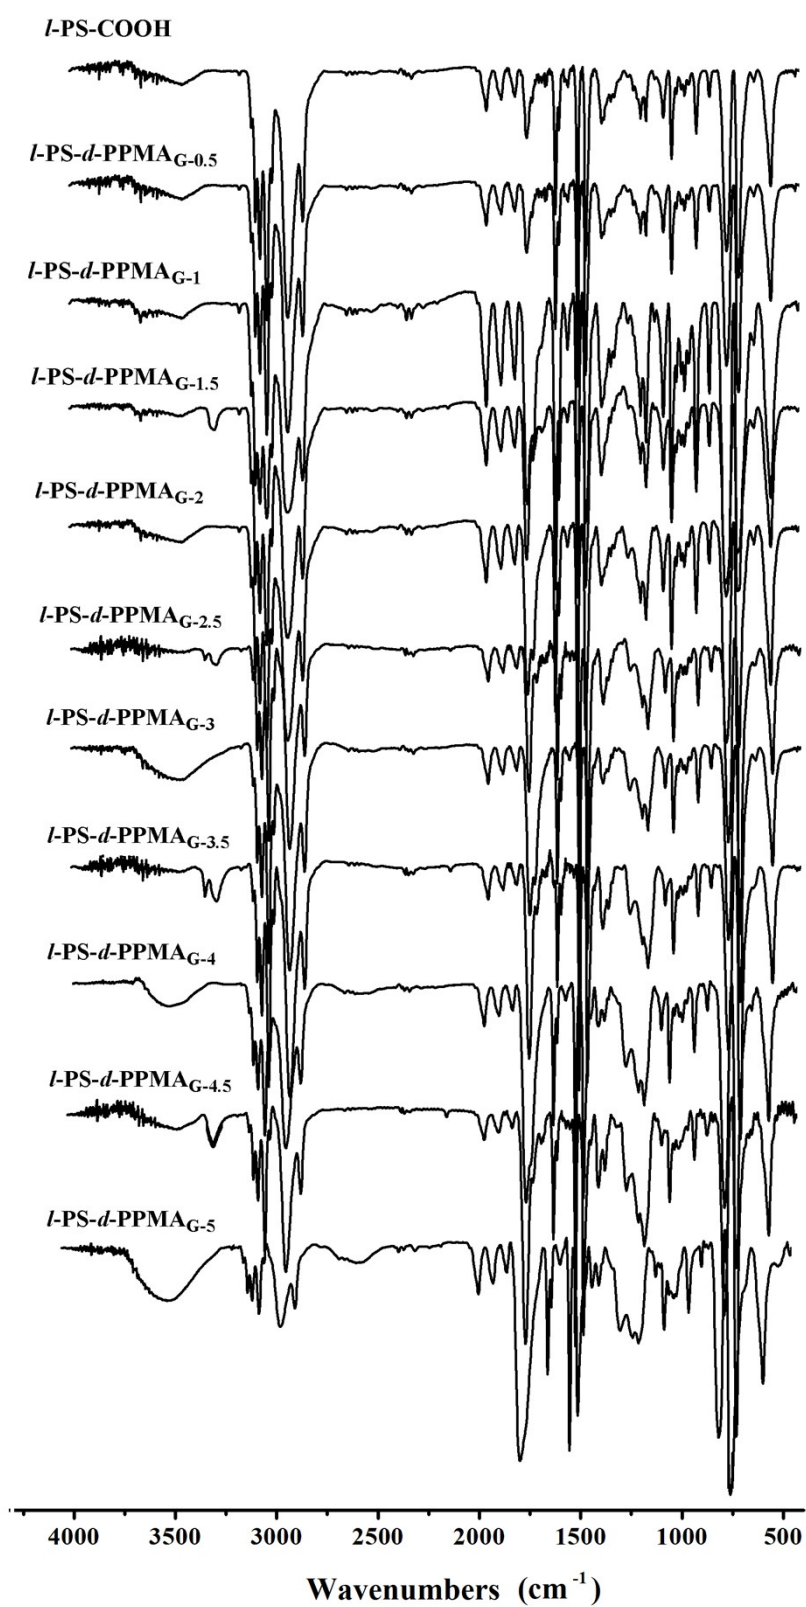

**Figure S2.** FT-IR spectra of the hybrid copolymers *l*-PS-*d*-PPMA from G1 to G5 and their corresponding intermediates.

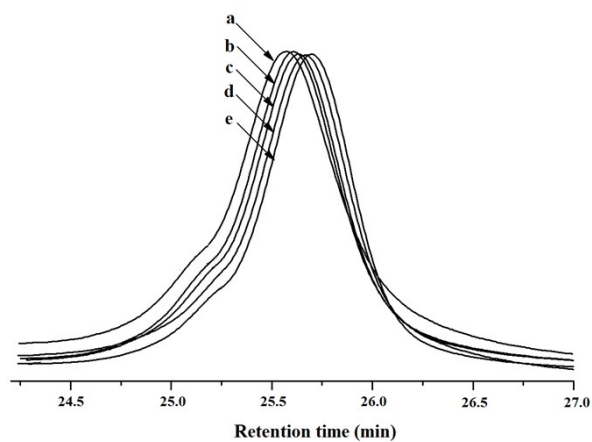

**Figure S3.** GPC traces of the copolymers (a) l-PS-PPMA<sub>G1</sub>, (b) l-PS-PPMA<sub>G2</sub>, (c) l-PS-PPMA<sub>G3</sub>, (d) l-PS-PPMA<sub>G4</sub> and (e) l-PS-PPMA<sub>G5</sub>.

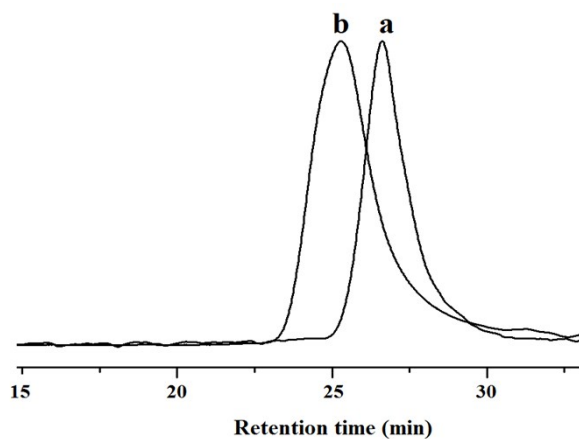

**Figure S4.** GPC traces of (a) PPMA<sub>G5</sub>-64COOH and (b) copolymer PPMA<sub>G5</sub>-mPEG/MAPEG.

Reference:

1. X. S. Fan, Z. G. Hu, G. W. Wang, *J. Polym. Sci., Part A: Polym. Chem.*, 2015, 53, 1762–1768.
